# Supplementary material for: The Structural Determinants for α1-Adrenergic/Serotonin Receptors Activity among Phenylpiperazine-Hydantoin Derivatives
Source: MDPI journal article supplement (doi:10.3390/molecules26227025), 2021-11-20

## Supporting Information

### The structural determinants for $\alpha_1$ -adrenergic/serotonin receptors activity among phenylpiperazine-hydantoin derivatives.

Katarzyna Kucwaj-Brysz<sup>a</sup>, Anna Dela<sup>a</sup>, , Marek Bednarski, Sabina Podlewska<sup>a,b</sup>, Agata Siwek<sup>d</sup>, Grzegorz Satała<sup>b</sup>, Kinga Czarnota<sup>a</sup> Jadwiga Handzlik<sup>a</sup>,  
Katarzyna Kieć-Kononowicz<sup>a\*</sup>

<sup>1</sup> Faculty of Pharmacy, Department of Technology and Biotechnology of Drugs, Jagiellonian University Medical College, 9 Medyczna Street, 30-688 Kraków, Poland

<sup>2</sup> Maj Institute of Pharmacology, Polish Academy of Sciences, 12 Smętna Street, 31-343 Kraków, Poland

<sup>3</sup> Department of Pharmacodynamics, Jagiellonian University Medical College, Medyczna 9 Street, 30-688 Kraków, Poland

<sup>4</sup> Department of Pharmacobiology, Jagiellonian University Medical College, Medyczna 9 Street, 30-688 Kraków, Poland

\* Correspondence: katarzyna.kucwaj@uj.edu.pl; katarzyna.kiec-kononowicz@uj.edu.pl

† Equal contribution

### Table of contents

1. <sup>1</sup>H and <sup>13</sup>C NMR spectra for final compounds

Figure S1. (Z)-3-(2-hydroxy-3-(4-(2-methoxyphenyl)piperazin-1-yl)propyl)-5-(3-methoxybenzylidene)imidazolidine-2,4-dione (**4**)

$^1\text{H}$  NMR (500 MHz, DMSO- $\text{d}_6$ )

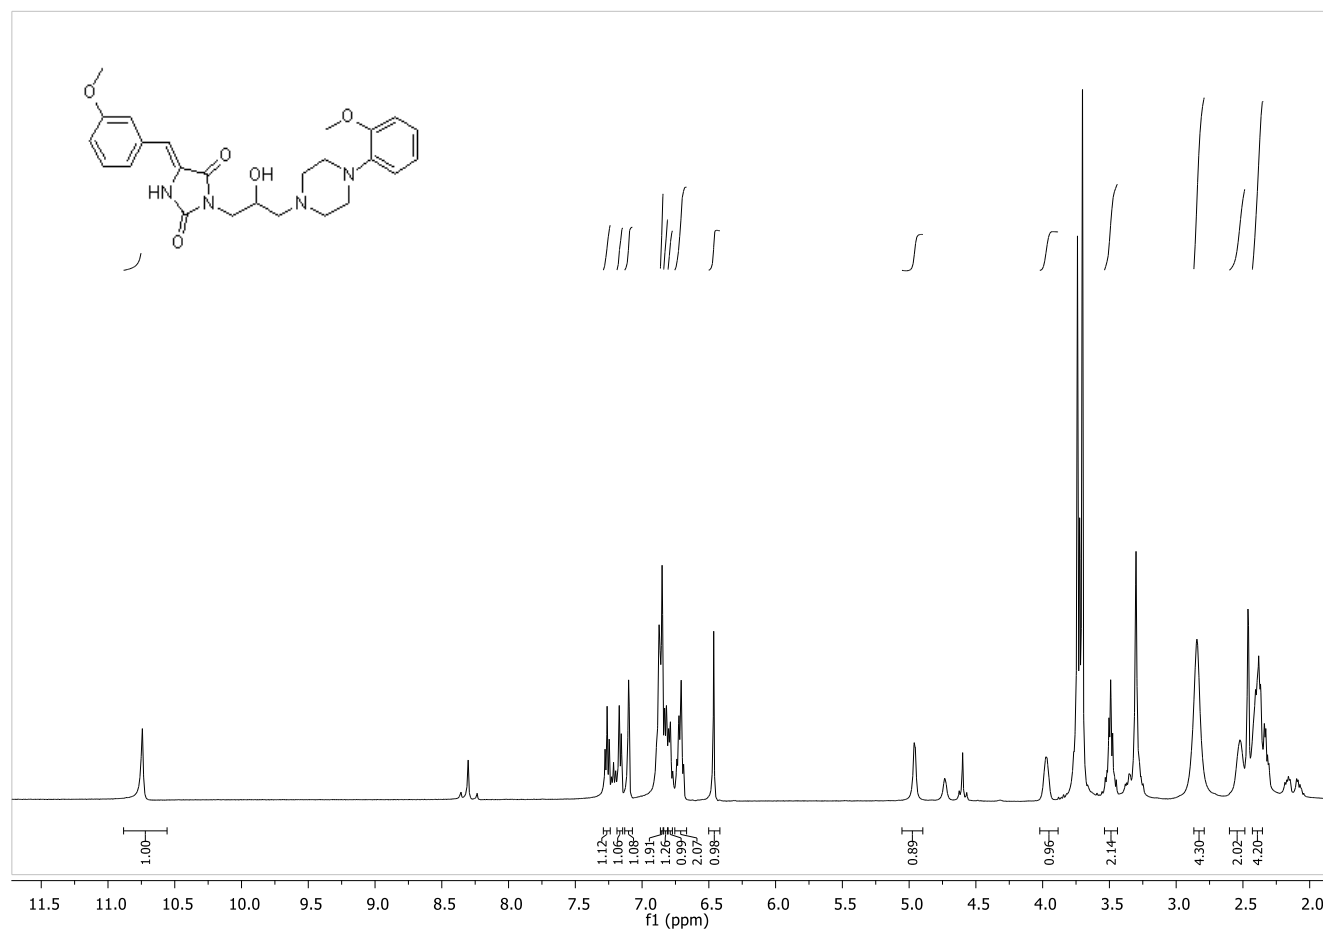

Figure S2. AD09 (Z)-3-(3-(4-(2-ethoxyphenyl)piperazin-1-yl)-2-hydroxypropyl)-5-(3-methoxybenzylidene)imidazolidine-2,4-dione (**5**)

$^1\text{H}$  NMR (500 MHz, DMSO- $d_6$ )

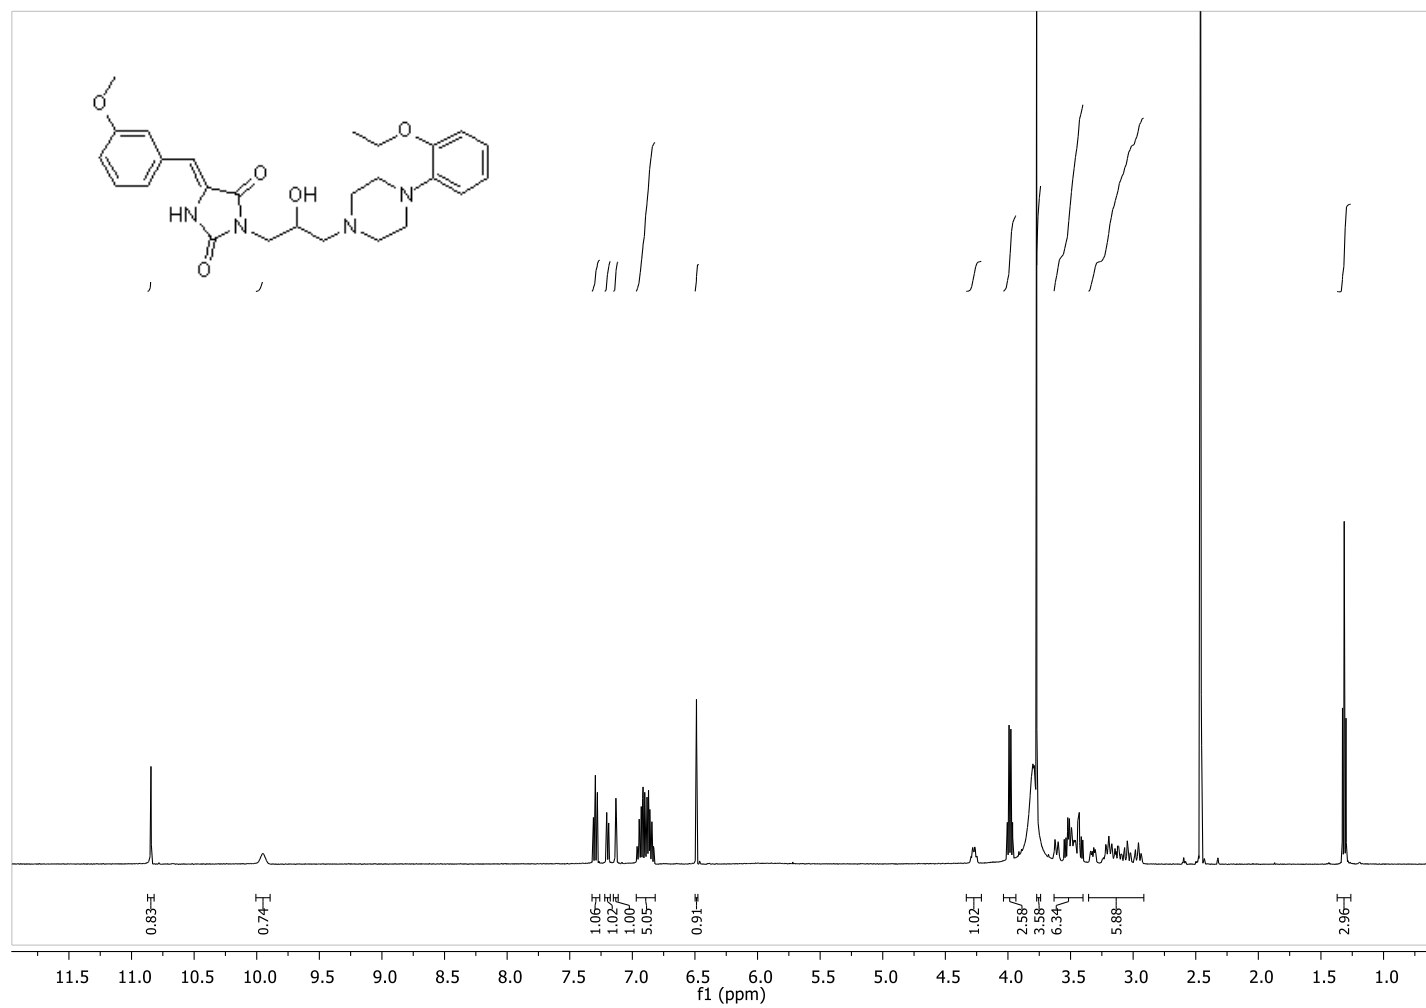

Figure S3. AD15 (Z)-3-(2-hydroxy-3-(4-(2-methoxyphenyl)piperazin-1-yl)propyl)-5-(4-methoxybenzylidene)imidazolidine-2,4-dione (**6**)

$^1\text{H}$  NMR (500 MHz, DMSO- $d_6$ )

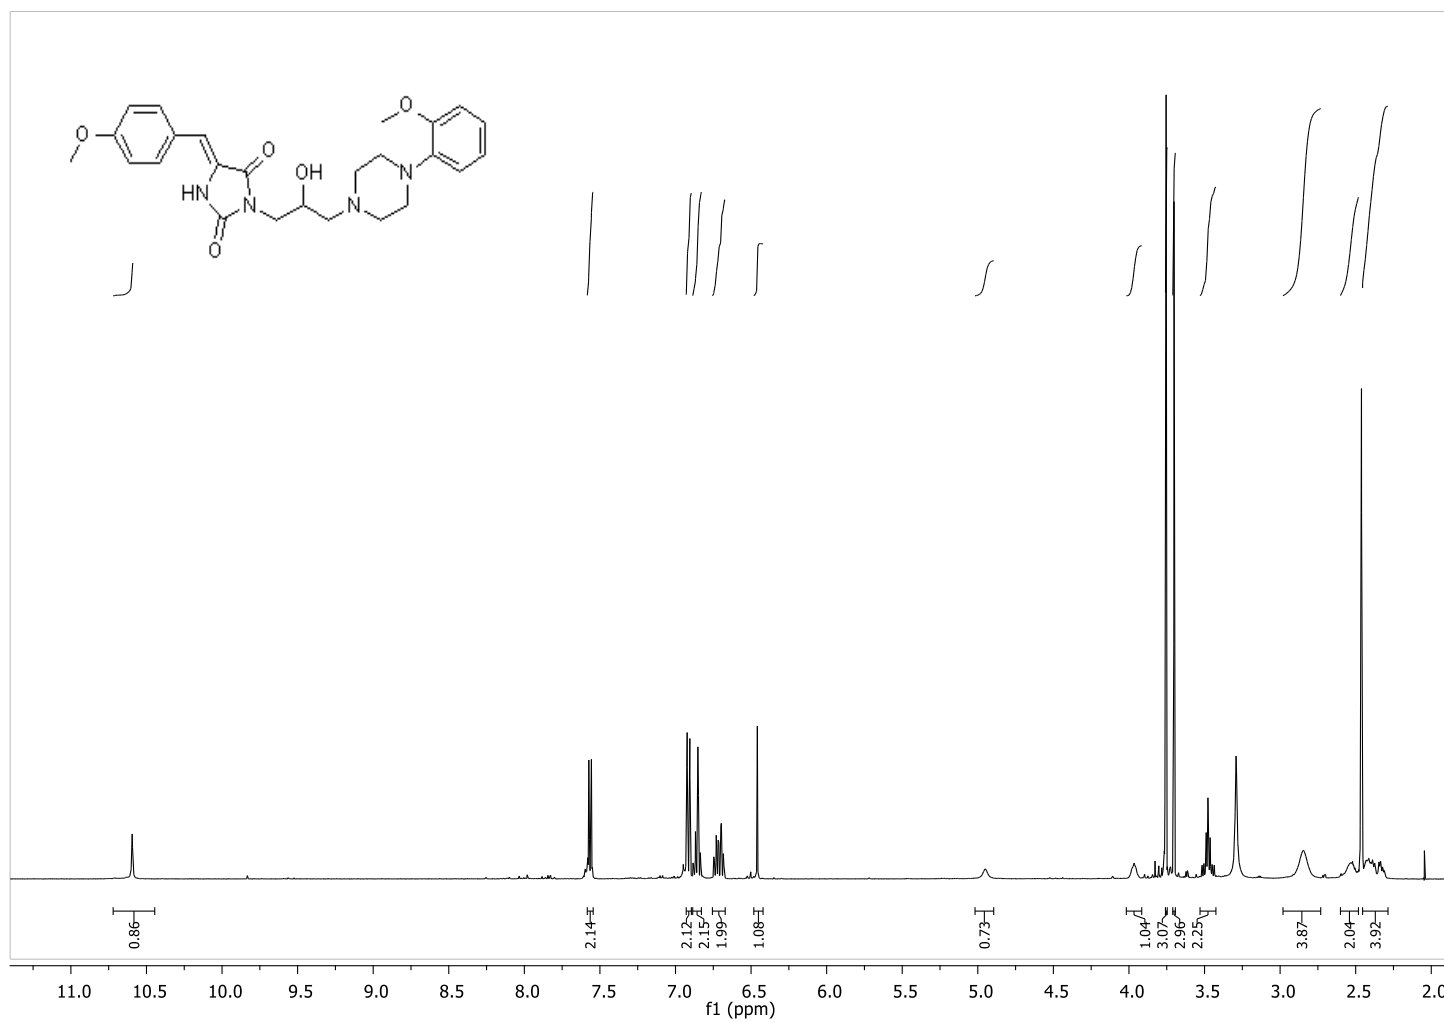

Figure S4.. AD13 (Z)-3-(3-(4-(2-ethoxyphenyl)piperazin-1-yl)-2-hydroxypropyl)-5-(4-methoxybenzylidene)imidazolidine-2,4-dione (**7**)

$^1\text{H}$  NMR (500 MHz, DMSO- $d_6$ )

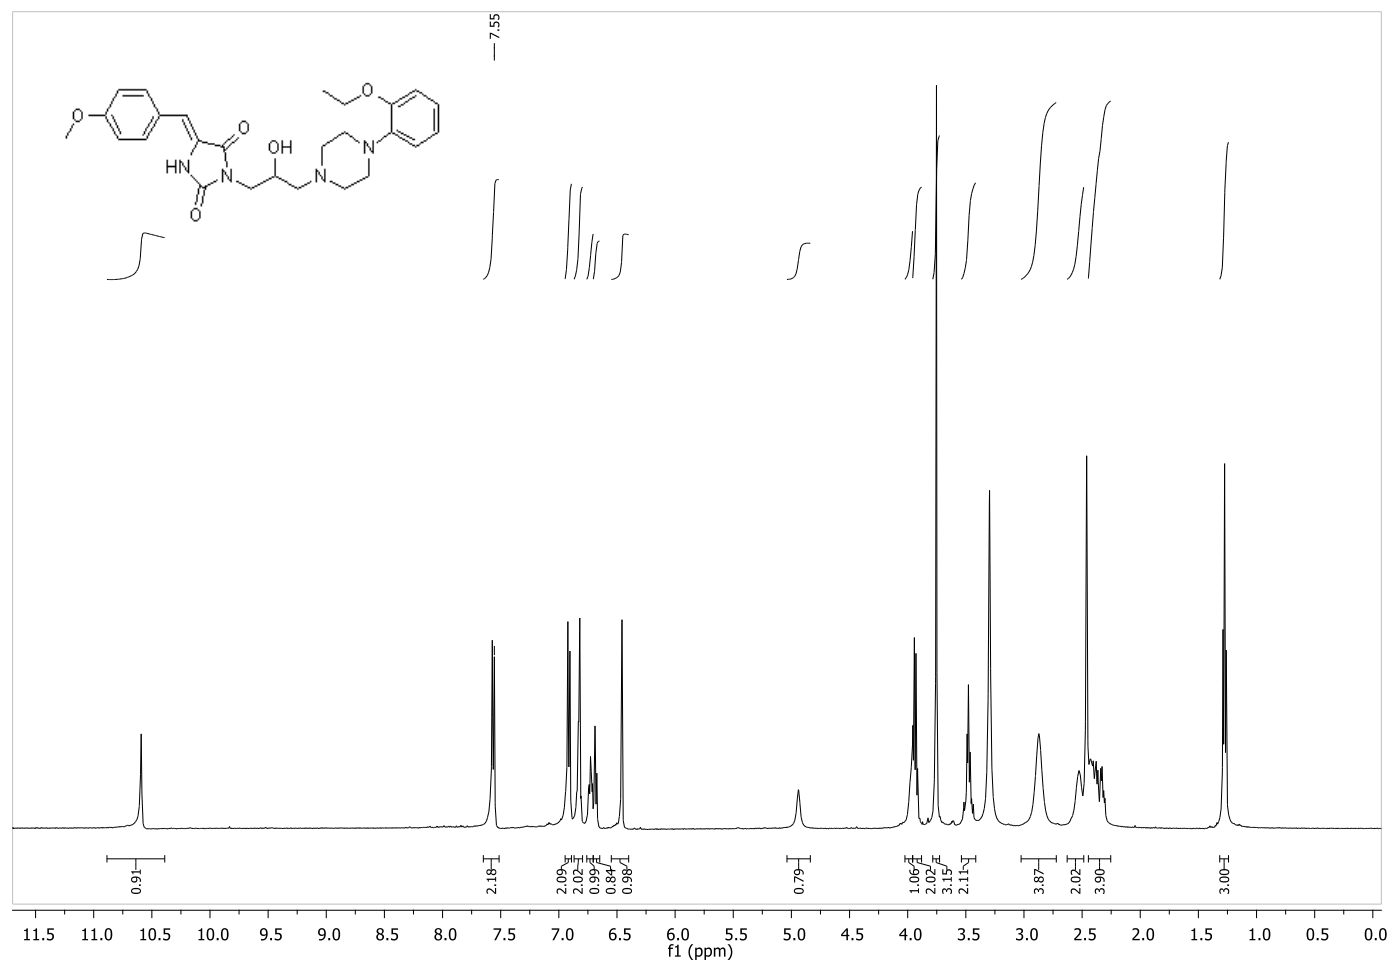

$^{13}\text{C}$  NMR (125 MHz, DMSO- $\text{d}_6$ )

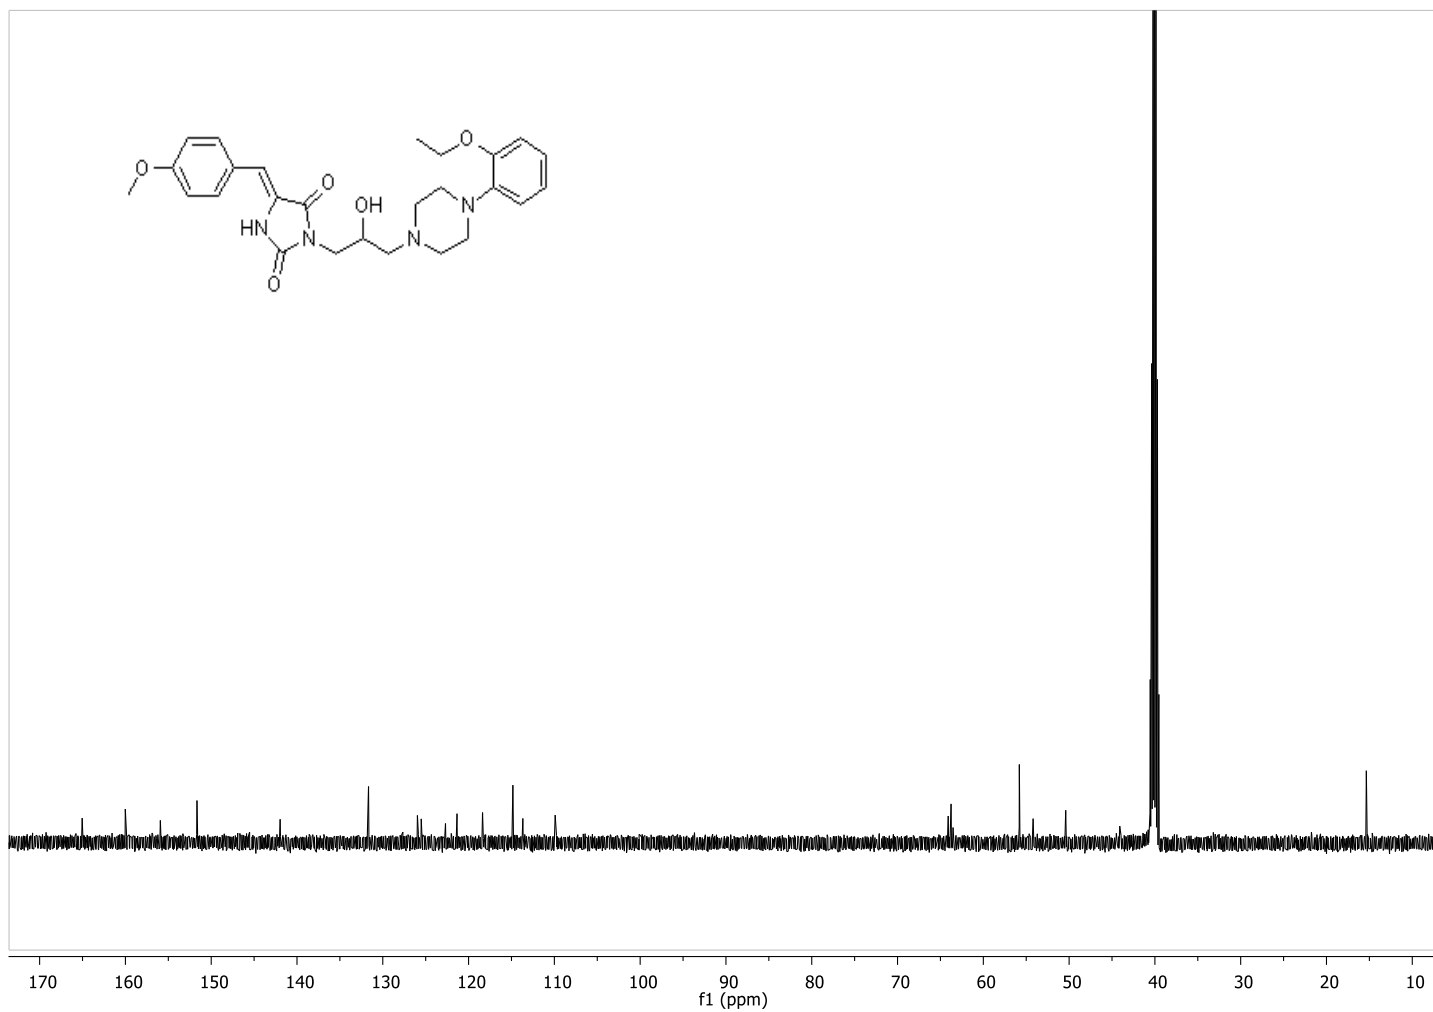

Figure S5. AD38 (Z)-3-(3-(4-(2-fluorophenyl)piperazin-1-yl)-2-hydroxypropyl)-5-(4-methoxybenzylidene)imidazolidine-2,4-dione (**8**)

$^1\text{H}$  NMR (500 MHz, DMSO- $d_6$ )

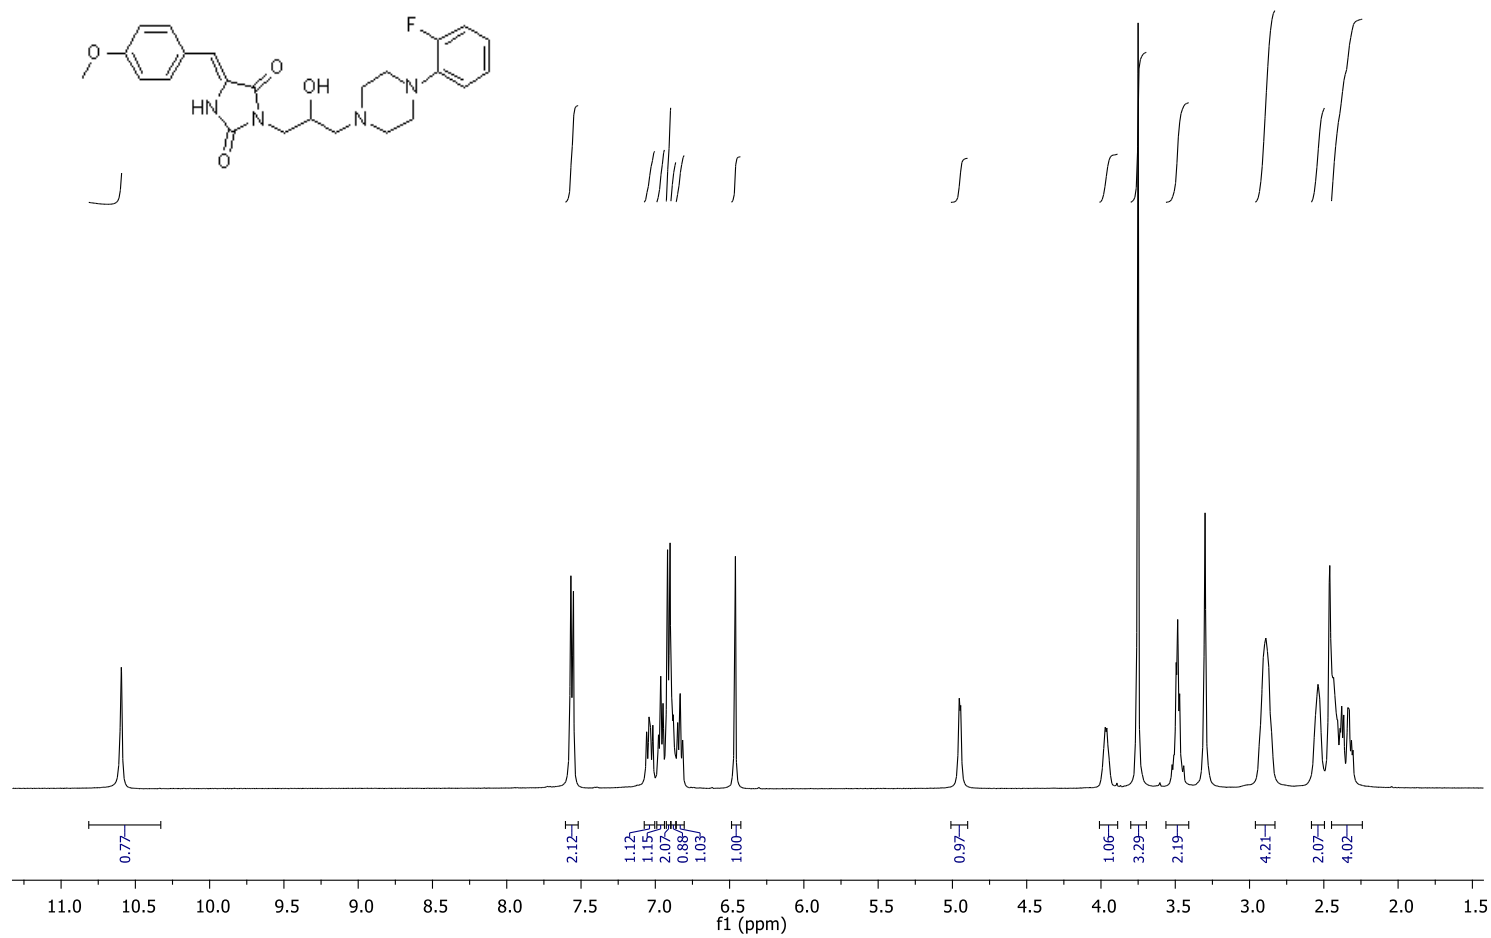

$^{13}\text{C}$  NMR (125 MHz, DMSO- $\text{d}_6$ )

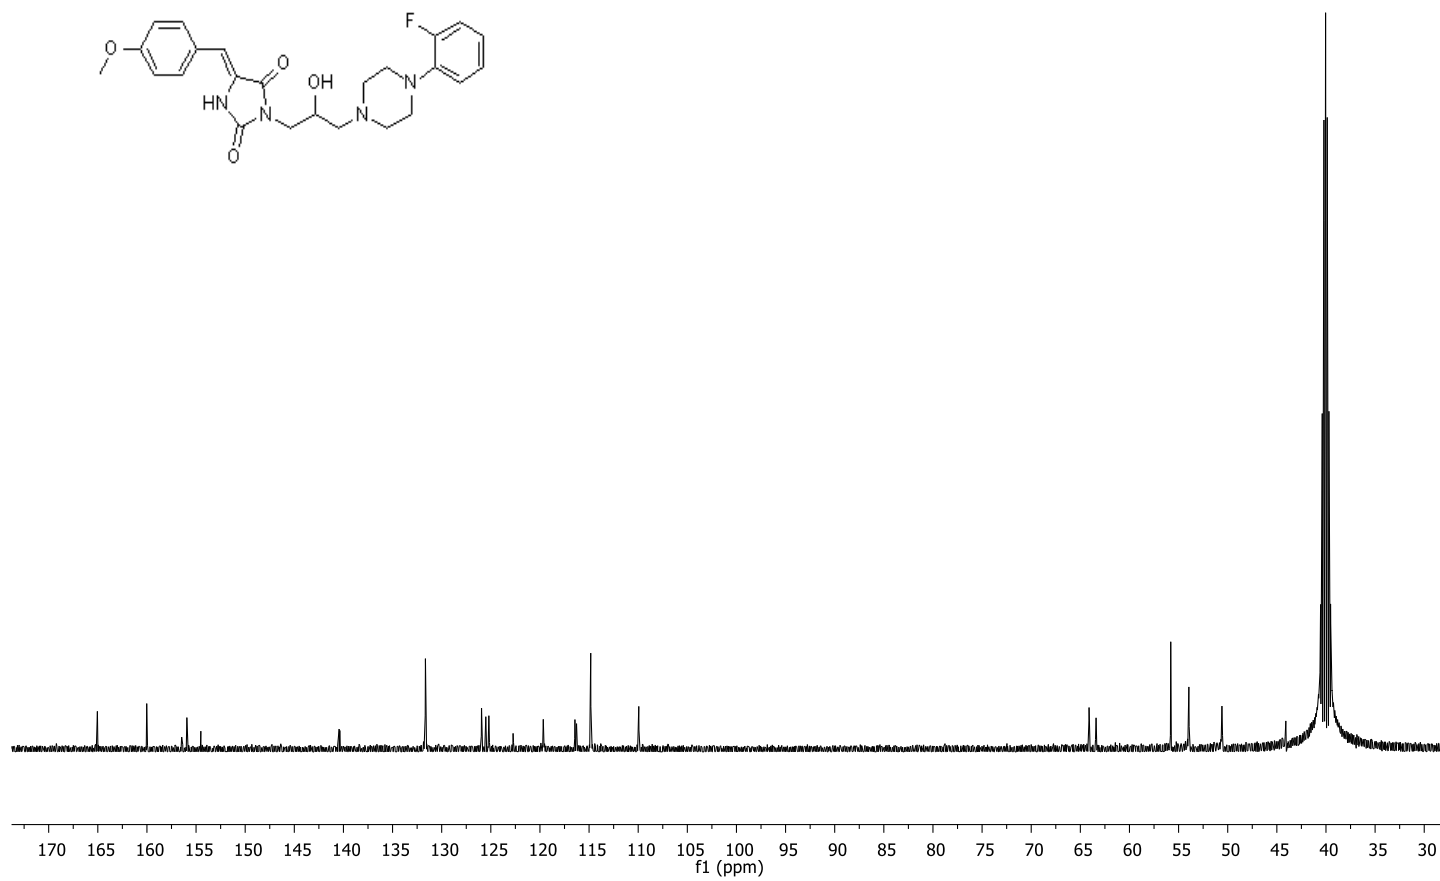



Figure S6. /AD34 (*Z*)-3-(3-(4-(2-ethoxyphenyl)piperazin-1-yl)-2-hydroxypropyl)-5-(3,4,5-trimethoxybenzylidene)imidazolidine-2,4-dione (**9**)

<sup>1</sup>H NMR (500 MHz, DMSO-d<sub>6</sub>)

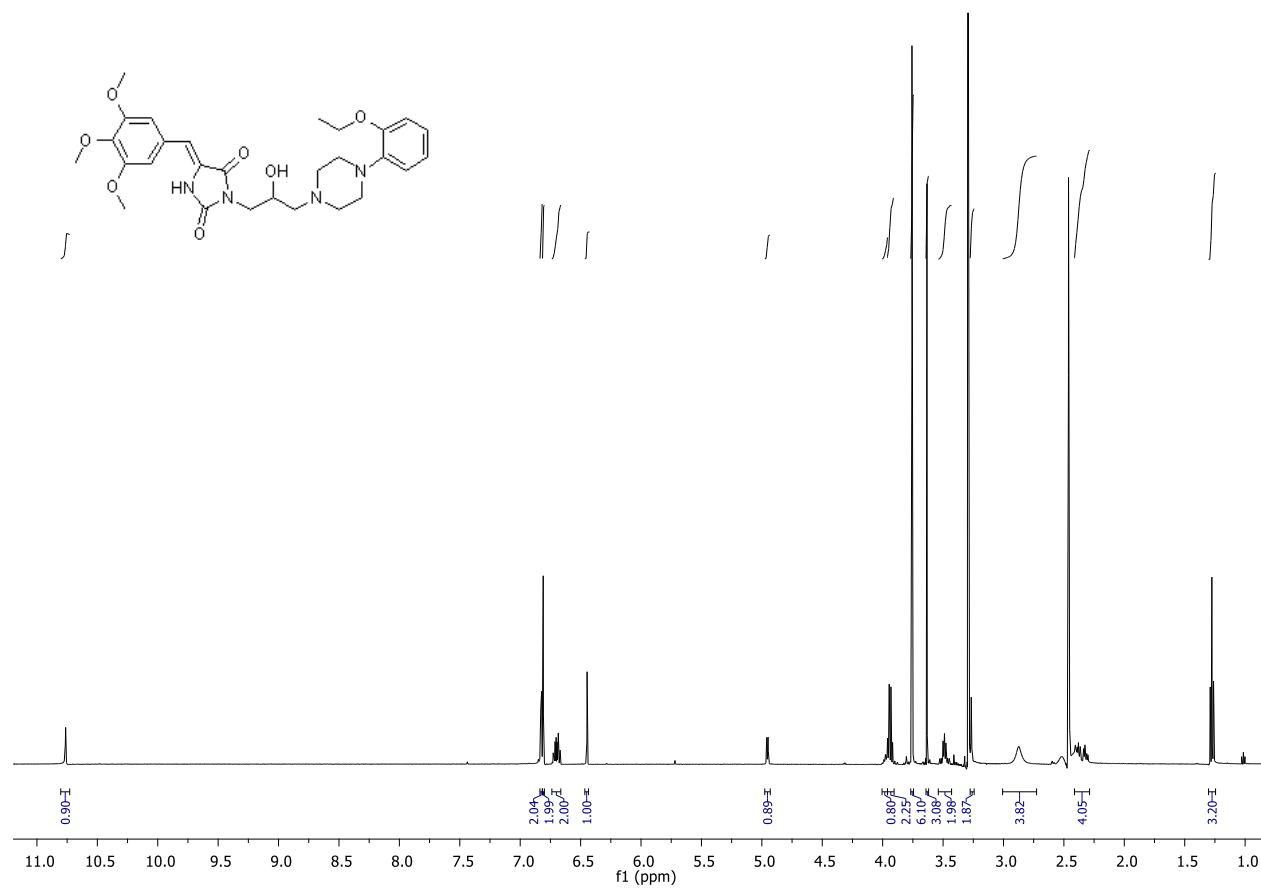

Figure S7. AD42 *(Z)*-3-(3-(4-(2-chlorophenyl)piperazin-1-yl)propyl)-5-(3-methoxybenzylidene)imidazolidine-2,4-dione (**11**)

<sup>1</sup>H NMR (500 MHz, DMSO-d<sub>6</sub>)

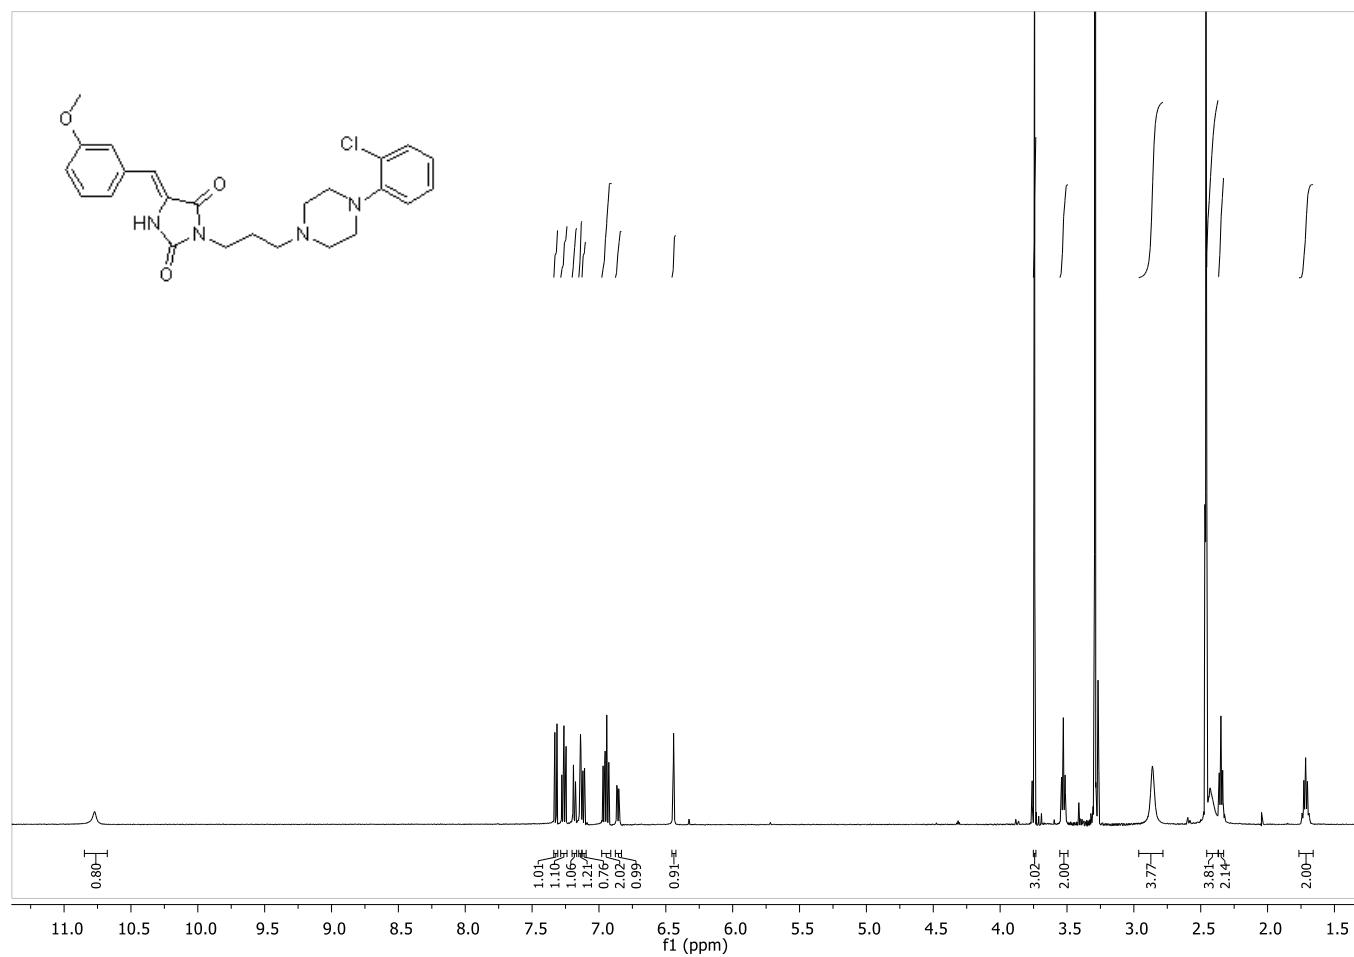

Figure S8. AD26 *(Z)*-5-(4-methoxybenzylidene)-3-(3-(4-(2-methoxyphenyl)piperazin-1-yl)propyl)imidazolidine-2,4-dione (**12**)

<sup>1</sup>H NMR (500 MHz, DMSO-d<sub>6</sub>)

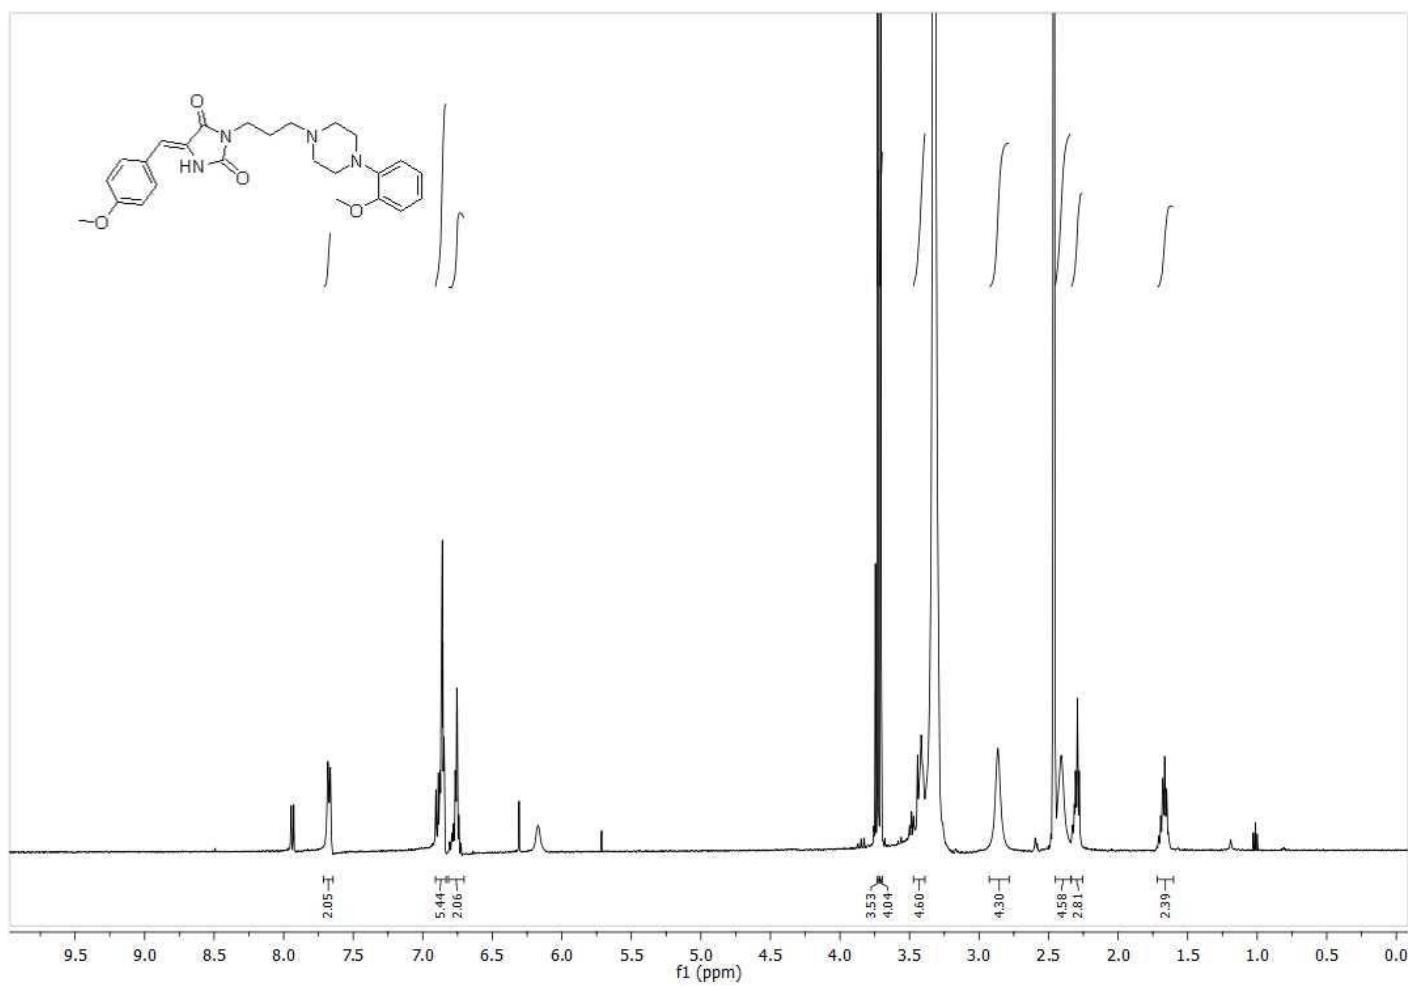

Figure S9. AD30 *(Z)*-3-(3-(4-(2-ethoxyphenyl)piperazin-1-yl)propyl)-5-(4-methoxybenzylidene)imidazolidine-2,4-dione (**13**)

<sup>1</sup>H NMR (500 MHz, DMSO-d<sub>6</sub>)

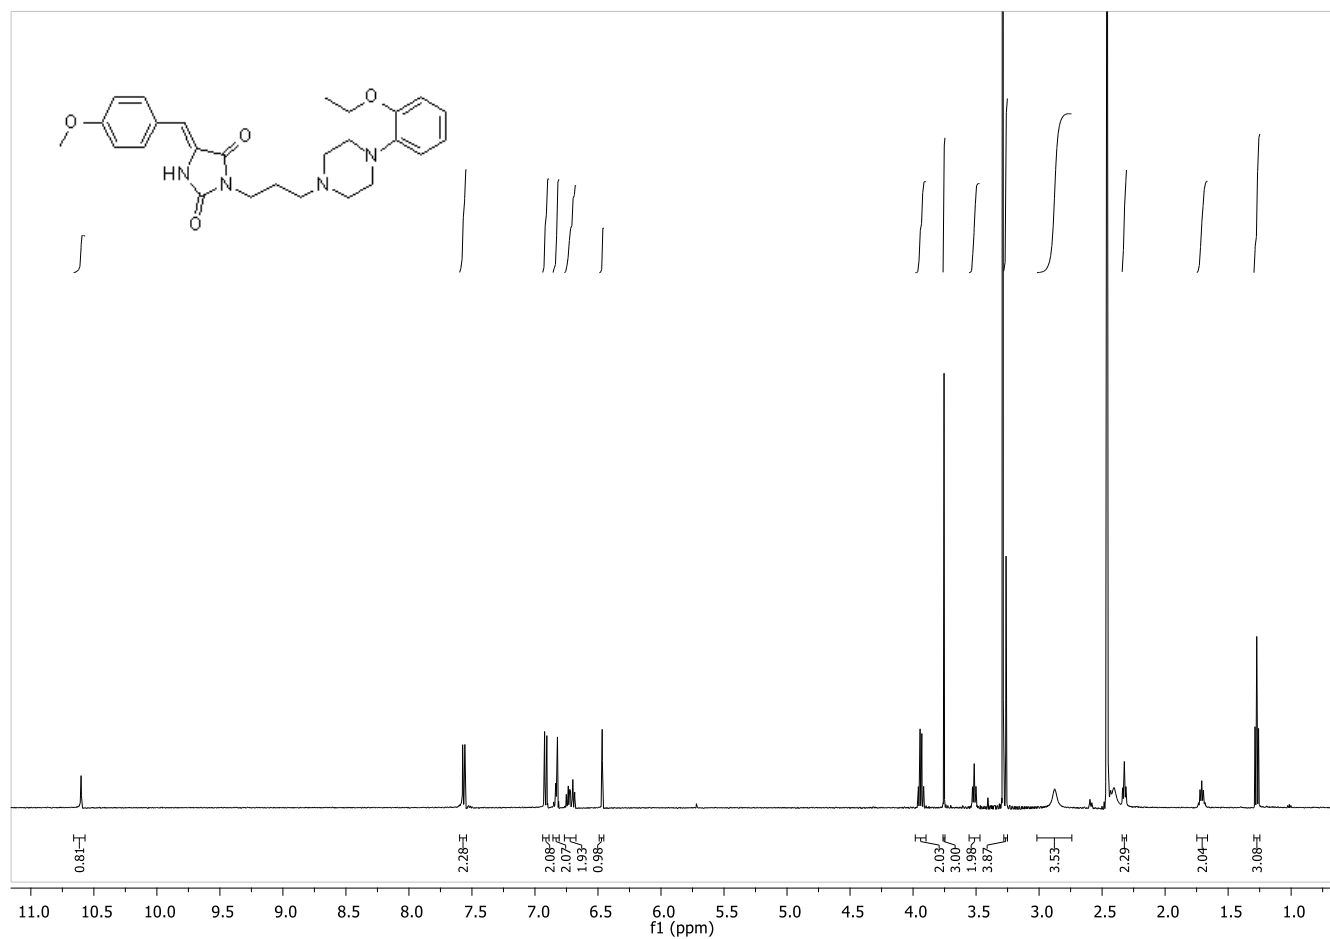

Figure S10. AD28 (Z)-3-(3-(4-(2-methoxyphenyl)piperazin-1-yl)propyl)-5-(3,4,5-trimethoxybenzylidene)imidazolidine-2,4-dione (**15**)

<sup>1</sup>H NMR (500 MHz, DMSO-d<sub>6</sub>)

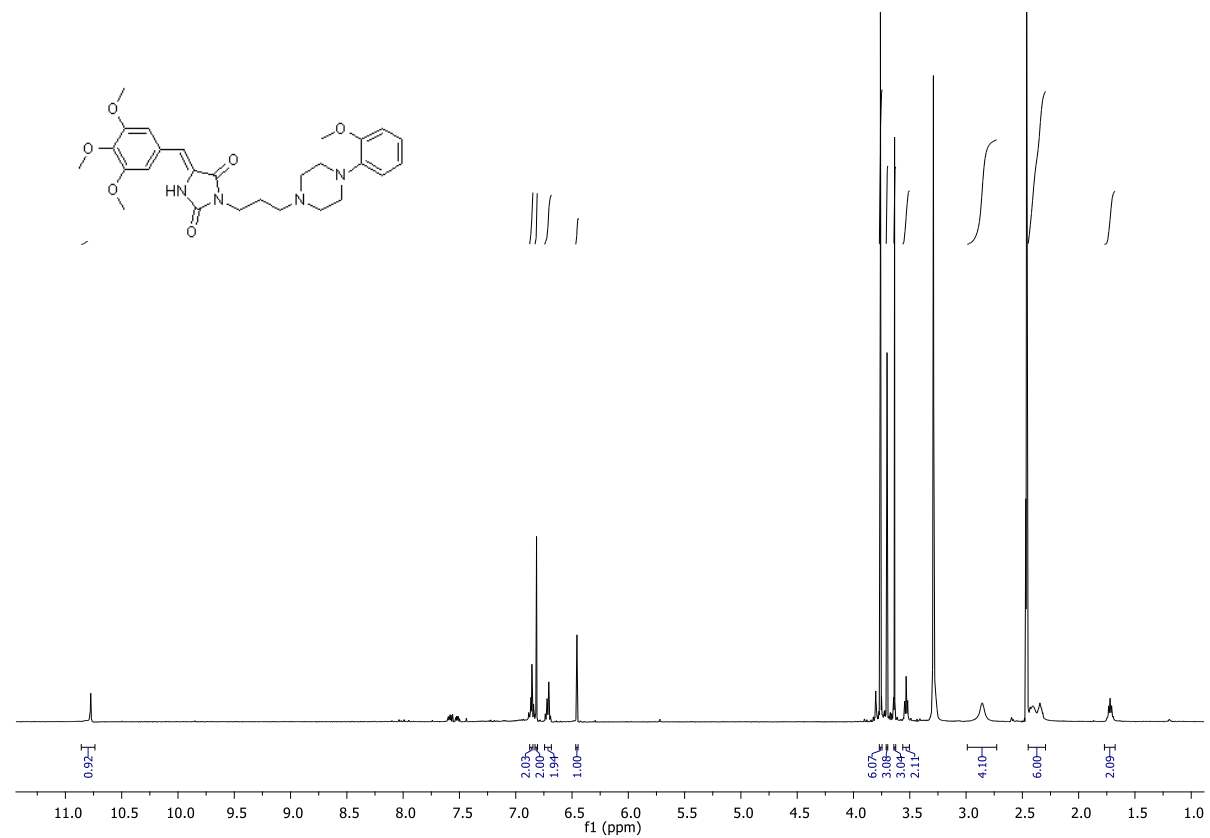

Figure S11. AD33 *(Z)*-3-(3-(4-(2-ethoxyphenyl)piperazin-1-yl)propyl)-5-(3,4,5-trimethoxybenzylidene)imidazolidine-2,4-dione (**16**)

$^1\text{H}$  NMR (500 MHz, DMSO- $\text{d}_6$ )

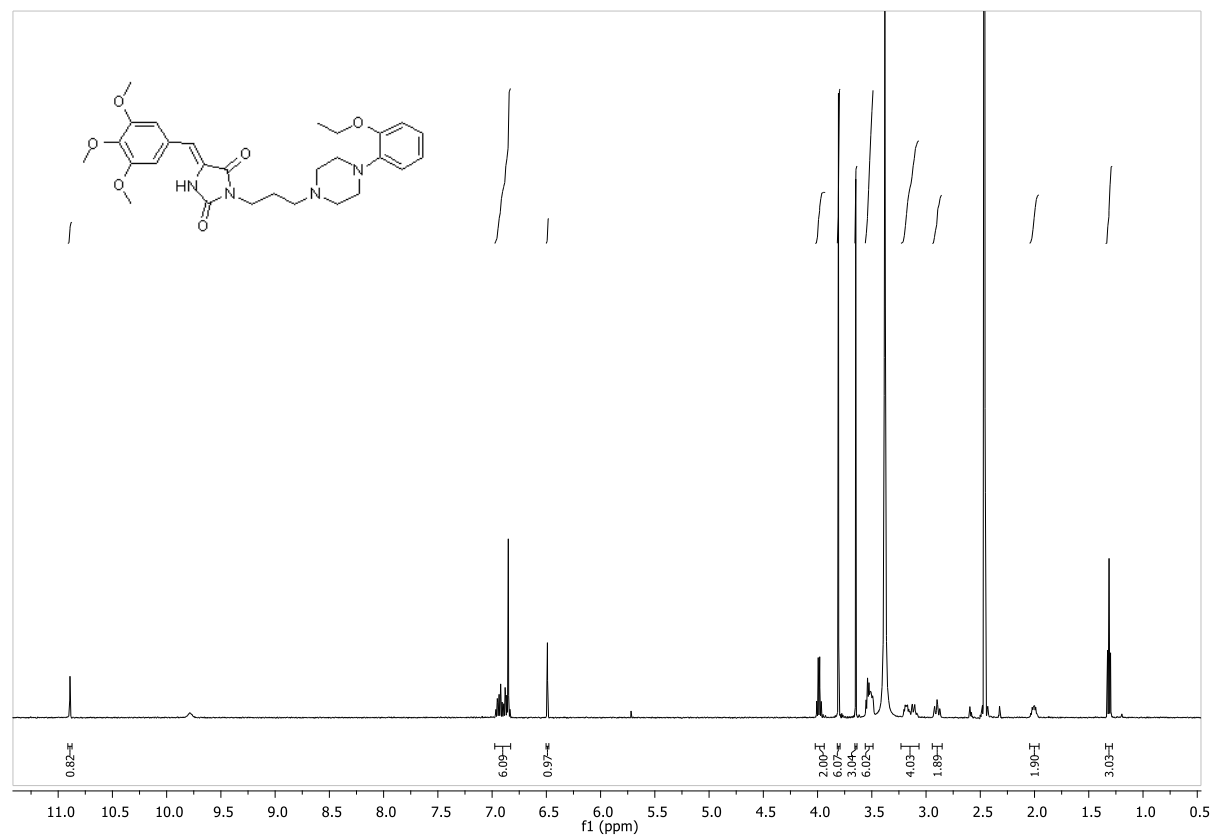

Supplement: s1 [file s1]
